# Supplementary material for: Hsp90β knockdown in DIO mice reverses insulin resistance and improves glucose tolerance
Source: PubMed Central journal article supplement (PMC5796506; doi:10.1186/s12986-018-0242-6), 2018-02-02

Figure S2

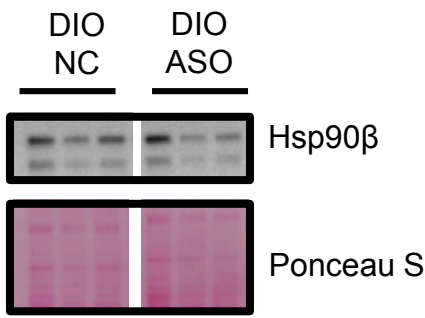

Liver

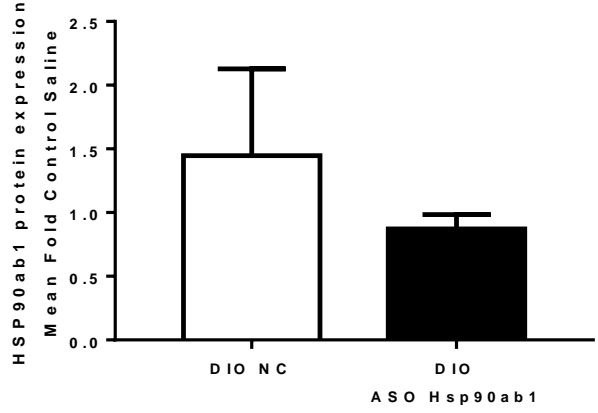

Supplement: 12986_2018_242_MOESM2_ESM.pdf [file 12986_2018_242_MOESM2_ESM.pdf]
